# Supplementary material
Source: publisher site journal article supplement (https://www.spandidos-publications.com/3723/downloadSupplementary)
Supplement: Supplementary file 1 [file downloadSupplementary]

## Sheet: Prediction
Table SII. Potential target genes of miR-18a-5p identified.
TargetScan	PicTar	TarBase	microT_CDS
ABTB2	GLRB	SCYL3	ERLIN1
AC137932.1	FLJ10350	GCLC	OSBP2
AC140061.12	CAMKK2	NIPAL3	NT5DC2
ADAT2	NEDD9	M6PR	TAOK3
ADD3	BTG3	KDM1A	ESR1
AEBP2	ARFRP2	HCCS	TWF1
ALCAM	SH3BP4	IBTK	DENND3
AMIGO1	NRG1	FBXL3	DIRAS2
ANK3	CRIM1	MAP3K9	BRAF
ANKRD13C	SIM2	PAFAH1B1	POU2F1
ANKRD50	ZNF367	PSMB1	UBASH3B
ANKRD52	CDK11	PKD1	DAAM2
ASXL2	HSU79303	MAPK8IP2	PHLPP2
ATM	PTGFRN	CSDE1	PRLR
ATP13A1	ASXL2	UBE3C	SLC39A3
ATP8A1	HMGCS1	REV3L	ODZ3
ATXN1	KLEIP	BAZ1B	FMN1
ATXN1L	C20orf59	IDS	FAM195A
ATXN2L	SOCS5	ELOVL5	SMAP2
BBX	DC-UbP	GPRC5A	GSK3B
BEND3	BRODL	MAMLD1	BRWD3
BHLHE22	PERQ1	XYLT2	C5orf30
BMP2K	HSF2	WWTR1	CREBL2
BRWD1	DKFZP566E144	PRDM11	ASTN1
BRWD3	EPB41L1	HSF2	PHF19
BTG3	SARA1	KPNA6	ENC1
C14orf166	FLJ10099	INSRR	HMG20B
C1orf21	MAN1A2	VEZT	PHF7
C5orf30	YPEL5	SNX1	SAR1A
C9orf114	GlcNAc	TBPL1	CENPC1
CACNB3	SON	RABEP1	PTPRK
CADM2	LTBR	NUP160	GMPR
CAMK2N1	HIF1A	TIMP2	UBE2Z
CAMKK2	XYLT2	BOD1L1	PCGF2
CBX5	DDX42	VCAN	KIAA1958
CCDC171	PAPPA	CTNNA1	OLFML2B
CCDC88A	C5orf13	ARAP2	MSANTD1
CCND2	SET8	SCML1	OTX1
CDC42	CTGF	CLPTM1L	ZNF738
CDH6	GAB1	FNIP2	C15orf38-AP3S2
CDK14	BHLHB5	MSMO1	SLC6A6
CDK19	VPS54	LY75	LAT
CDK2	ACTB	ARID4B	SLC39A8
CDS2	RABGAP1	GINM1	ATP13A4
CEP85L	MAK3	EIF2AK2	TMEM212
CHRM2	PDE4D	ZNF280C	CBLN2
CHRM3	TAIP-2	SNRNP40	FBXL5
CLCC1	C1orf9	NCKAP1	EFS
CLCN4	KIAA1078	GPBP1	ZNF621
CLIP3	FCHSD2	HIPK2	ZBTB44
CNTNAP1	ADD3	BTBD1	AKR1D1
COLEC10	HCN4	TRAM2	GCLC
CREBL2	PACSIN1	SPEN	C3orf49
CRIM1	FLJ21616	ASB1	PROM2
CSRNP3	HDHD2	TBC1D1	SHROOM3
CTDSPL	CGGBP1	ELAVL1	KIAA1324
CTGF	DPP10	SMARCD1	ESCO2
DAAM2	AEBP2	ASPM	ZNF611
DAB1	FLJ14668	PFKP	SCRN1
DDI2	FOXN1	NEO1	DICER1
DICER1	SATB1	DHX8	ETV6
DIP2C	CDC42	NUCKS1	AC091435.1
DIRAS2	PARP6	GAL	GPX2
DOCK4	PIAS3	RORA	ATXN2L
DPP10	DUSP16	NEDD4	MYO1H
DUSP16	HRIHFB2122	NDST1	ATXN1L
EHMT1	GCLC	PABPC1	ADD2
ENC1	EHMT1	ATP2B1	IQSEC3
ENDOD1	RAB5C	MAP4K4	RASA2
EPB41L1	LOC90355	SNX13	CRIM1
EPHA7	FBXL11	WBSCR22	INPPL1
ERBB2	KIAA1190	SEL1L	ELK4
ERI1	NIP30	TRIB2	ZNF468
ESR1	RAB11FIP2	MBD3	SEL1L3
ETV6	PRICKLE2	ZFYVE26	VAT1L
EXPH5	HT008	SREBF1	FBXO30
F3	ZNF537	MARK2	RUVBL1
FAF1	LOC399947	NFATC3	NIPAL2
FAM136A	TRIB2	PPP2R3A	ZNFX1
FAM166B	NEUROD1	ATP2A3	HEATR6
FAM192A	JARID1B	CA12	SIX3
FAM196B	CLK2	DPP8	KCTD16
FAM229B	WSB1	C19orf10	BRPF3
FAM3C	IRF2	ACTB	SV2B
FAM73A	SOX21	MKRN2	ZNF28
FBXL3	KIAA0934	BAZ2A	ODF2L
FBXO28	USP6	UNG	CDH6
FCHSD2	KIAA1212	KLHL20	ENDOD1
FER	FLJ10546	SNRPA	ORC2
FGF1	SMAD2	HOXA9	THBS1
FNDC3B	IMP-2	CBFA2T2	RUNX1
FOSL2	UBE2G1	SAR1A	CEP85L
FOXH1	CGI-72	SRCAP	UBTD2
FRS2	MEIS1	CNOT4	GLRB
FRYL	TAOK3	C5orf22	AQP9
FUBP1	SH3MD2	TRAF5	FCHSD2
FZD3	MEF2D	XPO1	TMEM248
GAB2	C9orf94	KAT6A	SRP19
GCLC	QKI	TNPO1	TRPM8
GDF5OS	CLIPR-59	PDS5B	XK
GIGYF1	ETV6	ZNF264	AFF1
GINS2	SFRS7	STARD7	FKTN
GLG1	PHF2	SSH1	TBCK
GMPR	FLJ13855	APLP2	WDFY4
GNAS	RUNX1	TXLNA	RIC3
GPSM2	LIN28	CAD	ODZ4
GRWD1	NR3C1	CTTN	GATSL3
GTDC1	FNBP1	B4GALT1	LMBR1L
GTF2A1	GAB2	EPDR1	L3MBTL1
HCFC2	PDZK3	TMED2	PDZD2
HCN4	NAV1	HUWE1	C11orf87
HEATR5A	MDGA1	ATXN7L3	RP11-429E11.3
HIF1A	CREBL2	ADD1	CCND2
HIF1AN	TFCP2L3	C14orf166	C7orf53
HMBOX1	PSD3	GNAS	UHRF2
HMG20B	ATP2B1	KCNH4	RABGAP1
HMGCS1	ZBTB4	RCOR1	RC3H2
HOMER1	ATXN1	PDPR	PCYT1A
HRK	STK4	TNRC6A	SH3BP2
HSF2	CTDSPL	PLEKHG2	SYPL1
HSF5	TRIM2	SCFD1	FRS2
IGF1	PLAG1	SUPT16H	ROBO2
IGF2BP2	PURB	EZR	ANKRD50
INADL		NUP50	HRK
INO80D		SEC22C	ZC3H6
IRF2		MAP3K1	ZBTB7C
ISL2		IKZF5	ADAT2
JAKMIP3		HIVEP1	CA12
JMY		BRPF3	C6orf225
KCMF1		RAB18	KLHL20
KCNA1		MAGEB2	EYA4
KCNA2		PES1	SMARCAD1
KCND3		TRIOBP	ZNF501
KCNH7		TNRC6B	RNF111
KCNJ2		CERK	ZNF643
KCTD16		RBM23	C22orf31
KDM2A		PRMT5	TMTC3
KDM5B		HIF1A	PAPPA
KIAA0232		DICER1	PPTC7
KIF3B		ZC3H14	MTNR1B
KIT		YY1	PPP6C
KLF7		APEX1	DCUN1D4
KLHL15		ARHGAP5	PHF2
KLHL20		SEC23A	DSC1
KPNA6		GINS1	ZNF302
LAT		STK4	MEF2D
LIF		ADNP	TOMM70A
LIN28A		SLMO2	C14orf118
LIN54		CSNK2A1	YWHAB
LMO4		HM13	TNFAIP3
LNPEP		SEC23B	DAD1
LPP		MYL9	LETM2
LSM14B		POFUT1	MLLT3
MANEAL		E2F1	CRB1
MAP3K1		SMAD7	GPR158
MAP7D1		POLI	RP11-176H8.1
MAPK1IP1L		CSTF2	MSL2
MAPK4		MID1	RGPD1
2021-03-05		RBM3	DAB1
MBNL1		FNDC3A	RWDD1
MBOAT2		KPNA3	ZNF480
MDGA1		ZNF629	KLF7
MEF2D		NUP93	NOTCH2
MESP1		CAPN15	DSG4
MFRP		GSPT1	MAP3K1
MLTK		ESRP1	SEC61A1
MRPL27		TRPS1	KIAA0513
MTF1		ERI1	TRAF5
MYLK		SLC39A14	KDM2A
MYO1C		HNRNPL	ZNF765
NAA50		PLEKHJ1	ANAPC1
NACC1		DMPK	ZNF280C
NACC2		URI1	CTDSPL
NAV1		CLIP3	AC135178.1
NCOA1		BABAM1	OLR1
NCOA2		TMEM205	MAP3K9
NEDD4		TNPO2	C17orf112
NEDD9		ZNF85	C1orf21
NEO1		MTPN	TMEM229A
NFAT5		MPP6	FZD3
NOTCH2		ZC3HAV1	FNBP1
NR1H2		TAX1BP1	TPM3
NR3C1		CASP2	HTN3
NREP		WASL	ATOX1
NRG2		AHR	ADD3
NUFIP2		TMEM248	SRSF7
NXT2		LIMK1	RABEP1
OLFML2B		UBE2R2	TAOK1
ONECUT1		ATRNL1	KCNMB1
ONECUT3		ERLIN1	F3
ORAI3		MAPK8	SYNM
ORC2		TNKS2	EPHA7
OTX1		LARP4B	VPS13A
PAPPA		FAM208B	FSD2
PARD6B		PPIF	PKNOX1
PDE1B		NUFIP2	IFNAR2
PDE4D		UBTF	GIGYF1
PDGFC		RAD51C	ATP2B1
PHAX		MTMR4	SKP1
PHC3		KPNB1	FBP1
PHF19		PNPO	NRXN1
PHF2		CPD	ALCAM
PLEKHA6		DDX5	CCDC30
PLXNC1		RAB5C	TNRC6B
PNISR		LRRC59	RNF187
POU2F1		HDAC5	EPB41L1
PPP6C		DUSP3	PDE4D
PRDM6		EFTUD2	RICTOR
PRKACB		SLC16A6	PURB
PSD3		TMEM97	HPSE
PTGFRN		PHF12	SLC35F5
PTP4A3		UBE2D3	IFIH1
PTPMT1		TBC1D9	MED1
PURB		GRPEL1	TMEM170B
RAB11FIP2		HSPA8	TMEM132B
RAB22A		PPP6R3	ZNF317
RAB5C		CCND1	G6PC3
RAB9A		BIRC2	DCAF7
RABGAP1		DDX6	TBC1D9B
RASA2		C11orf58	ZMYM6
RASAL2		BCL7A	MAPK1IP1L
RBBP8		RAD51AP1	RAB5A
RCOR1		CREBL2	KTN1-AS1
RIMKLA		CDKN1B	HCFC2
RNF145		NUP107	TTC8
RNF146		GAPDH	CLCN4
RNF19B		HCFC2	PTPN13
ROBO2		C2CD5	ATM
ROMO1		COL12A1	IL15
RORA		MCM9	LCORL
RTN2		SASH1	ASB3
RUNX1		MAPK14	DIP2C
SAR1A		ZNF451	PSD3
SATB1		PTP4A1	SH3BP4
SGPL1		ASCC3	NAA50
SH3BP4		MED23	KLHDC5
SH3KBP1		SOBP	PTCHD1
SIK3		EPM2A	KCNS2
SIM2		KIF20A	DDX18
SIX3		CNOT6	RNF145
SLC12A6		CCNG1	RAB11FIP2
SLC35A3		POLR3G	TGFB1I1
SLC35E1		LMNB1	ZNF655
SLC50A1		PDE4D	KRTAP1-1
SLC6A6		NR3C1	VGLL3
SMAD2		CSNK1A1	RSU1
SMAP2		ERGIC1	TMEM161B
SMARCC2		ATP6V0E1	ZNF26
SMG1		KPNA1	C10orf105
SNRK		ARMC8	USP6
SOCS5		BBX	KCNA1
SON		PLXNA1	ARL15
SORBS2		ACVR2B	ZNF814
SOX6		ARHGEF26	C3orf56
SPIN1		NKTR	ATRNL1
STAM2		INO80D	FBXO28
STK4		MOB1A	DCP2
STRIP2		TTL	RNF4
SUCO		SLC35F5	RBMX
SULT4A1		DNAJC27	WDR82
SYNCRIP		STAM2	TXK
TAL2		TANC1	FNDC3B
TAOK1		CLIP4	C9orf89
TBPL1		AUP1	NR3C1
TENM3		COQ10B	PHLDB2
TENM4		SF3B1	FAM8A1
TEX2		KDM3A	HIF1A
THBD		GORASP2	GK
THBS1		DCAF17	MAPK8
TLL1		ORC2	FAF1
TLL2		AAK1	ATL2
TMEM170B		SUMO1	ZNF493
TMEM2		NFE2L2	SLC7A9
TMEM248		EPHA4	CGGBP1
TNFAIP3		PRRX1	CEP68
TNRC6B		DHCR24	CA13
TPM3		DNAJC16	MDGA1
TRAPPC8		ICMT	PNLIPRP3
TRIB2		ASH1L	MYO9A
TRIM2		SFPQ	ABCC2
TRIOBP		TTF2	TMCC3
TRPC4		MAP7D1	MECP2
TTPAL		ETV3	ZFP36L1
TWF1		KDM5B	ATXN1
UBE2G1		SSX2IP	PANK2
UBE2Z		APH1A	IGF2R
UBP1		PRDX1	HSF5
UBTD2		DR1	SLC35A3
UHMK1		STMN1	SOCS5
UNG		DHDDS	C10orf68
UQCRB		STX12	BMP2K
USP24		TXNDC12	NEUROD1
VAT1L		KMT2A	ZNF525
VMA21		KIF14	VCP
VSTM4		ANKRD13C	PRDM6
WNT8B		FBXO30	FLT1
WNT9A		TNFAIP3	BEND3
XYLT1		RNF146	GPR61
XYLT2		CTGF	CSRNP3
YPEL5		MED28	XYLT2
YWHAB		ZNF430	C3orf67
ZBTB20		DCLRE1B	RBM26
ZBTB4		TGIF2	TLE4
ZBTB44		PKD2	CLK1
ZBTB47		CCNI	FOSL2
ZC3H12C		CCND2	FER
ZCCHC24		SATB2	HSF2
ZCCHC3		UBE2B	CYP4X1
ZCCHC4		PTBP3	NCOA2
ZFP36L1		RAB14	KCMF1
ZFP62		PHF19	RP11-305M3.3
ZFP69B		KDSR	ITGA2
ZNF280C		YLPM1	ZFP62
ZNF367		DNAL1	FAM9B
ZNF394		SUPT7L	NEO1
ZNF618		ATL2	SCYL2
ZNF704		YPEL5	PCDHB5
NIPAL3		C10orf88	NEK9
CACNG3		KANSL1	SATB1
CX3CL1		DUSP1	KRTAP4-3
PPP5C		PANK3	NR1H2
COX15		PLEKHG1	RBBP8
RGPD5		TCP1	KCNA2
TTC17		PROSER1	RORA
FAM168A		HSPH1	NXT2
SLC2A3		TMPO	IPMK
STYK1		SORBS3	NUSAP1
GNA11		CRISPLD1	ZNF592
GPKOW		RDH10	BHLHE22
C17orf85		ZNF549	LCK
KDM4B		NAA50	TMEM150A
REEP1		DESI2	PRIM1
EPHA8		ACVR2A	SLC30A9
MNT		COPA	ENTPD1
CA12		RBBP6	C17orf102
FGF20		ZNF644	FAM3C
TRAM2		HNRNPA2B1	ANKRD13C
OSTM1		SRGN	SOX6
IMPG2		ATF1	CDC42
PCDHB4		RAB9A	CHRM2
EPDR1		KCNJ2	ANO3
MRPL28		AGO2	NPL
ADAM11		FAM210B	THNSL2
RALGAPA2		PARD6B	TOR1B
OTUB2		ZNFX1	FRYL
GNPTG		LYPD3	COMMD2
CMTM6		USP9X	ZCCHC3
G2E3		KLHL31	PIK3C2A
MAPK13		CDKN1A	TMEM2
TGFBR3		GLO1	AC024563.1
CATSPERG		AHNAK	ABCC3
MISP		CNOT1	RAB9A
SNRPD3		TM9SF2	HIVEP1
PATZ1		BMP4	THRB
KDELR3		EML2	NRG1
GTPBP1		VASP	ADAMDEC1
C22orf31		SNRPB	BTF3L4
CBX7		TBC1D20	DNAI2
TAB1		AGO3	MBNL2
ST13		KLC1	REPS2
ZBED4		PRR12	PRICKLE2
TMED8		NUP214	USP24
SAMD15		DYRK2	KCNJ2
SPTLC2		SIN3B	CDK19
MTHFD1		ECHS1	GSTM2
EFS		PTPN12	IGF1
PCK2		DGCR8	CCPG1
PYGB		LIF	VMA21
R3HDML		KLHDC10	CYBASC3
FERMT1		FAM63B	GAB1
SNTA1		COPB1	BTG3
TLR8		KIF1C	KCNMB4
OLFM4		PHF20L1	MGEA5
CBLN1		AJUBA	TMEM208
PLLP		DAD1	ANK1
CCL22		REEP5	FAM73A
MMP15		SH3BP4	REV3L
SMPD3		MOSPD2	PTP4A3
KNOP1		LDLR	ATXN7
MGA		GTPBP3	SHE
AQP9		ZSWIM6	UGGT2
KIAA1199		ATXN10	KCNH6
SCG3		PRRC2B	FOXP2
VPS18		CLIP1	SH3BGRL2
PAG1		COX7B	TRAPPC10
EMC2		CAPN7	GUCY1A2
DCTN6		NR1H2	RC3H1
RELB		VPS25	KPNA6
APLP1		NDFIP1	LACTB2
TGFB1		MAP1B	PIK3CA
CRX		STARD3	SEC23IP
RAB3D		RHPN2	2021-03-05
TWISTNB		TRIM22	CSTF2
SP4		EFR3A	GUF1
SNX8		IMMT	RLIM
RBM28		MRPL35	OPRL1
RPA3		PNISR	JHDM1D
BCL7B		NIP7	DDX41
FKTN		KIAA0907	ZNF704
OBFC1		DCAF8	LRRFIP1
PPIF		TOE1	PDE5A
WNT3		RBM38	DNHD1
SLC25A11		INADL	FAM18A
AKAP10		SLC41A1	IRF2
CCL1		IRS4	TCEA2
COL1A1		BEX1	STARD3
HDAC5		MKRN1	FAM136A
DUSP3		ATP13A3	ZNF570
HLF		MED6	AP3S2
FOXN1		MBD2	ZNF619
CD38		CCNB1	UHMK1
WFS1		PTGFRN	NAPEPLD
CLNK		NOTCH2	SAMD12
CCND1		CDC73	TNRC6A
PANX1		TIMM17A	ZNF662
C11orf58		CCNH	KCNH7
LTBR		PUM1	GABRA4
MRPL51		YARS	MBNL1
GAPDH		PHC2	IKBKE
PRKAB1		BTF3L4	HEXIM1
GPR63		TPGS2	GMCL1
B3GAT2		TMED7	ZRANB1
ZBTB24		TMEM2	KIAA1919
MEP1A		PSAT1	HHLA3
SLC6A7		EPHA7	ADCYAP1
SPARC		GDF11	CAD
PCDHB5		CDK4	C17orf51
PCDHB15		CD164	TMEM230
THG1L		NHSL1	ZBTB4
ST8SIA4		CCT7	TRIM2
PCDH12		MDM2	NOL8
SLC7A14		TAF5L	HMGCS1
HEMK1		STX6	PCDHA6
NKTR		RC3H1	ABCA9
NDUFS1		USP37	NBPF24
TTL		TMBIM1	BTN1A1
GGCX		CKAP2	ZNF726
SLC9A2		COG3	SGCE
PASK		DCAF7	KCNIP1
GORASP2		WDR33	ZNF367
VAX2		TOR1B	DUSP5
NT5C1A		TOR1A	PPIF
AKR7A2		SLC2A8	UPP1
SLC5A9		ENPP2	SLC35B4
MMP8		RNF38	THBD
TTR		TFAP2A	ZNF280B
FBXO30		TJAP1	HEY1
FGF23		CREBZF	CAMK1D
ELL2		GGH	SUCO
ZFAND5		PPP2R1B	RYBP
FKBP15		NAB1	KCNV1
VPS4B		SECISBP2L	SPEF2
NEK9		APH1B	LSM14B
LGALSL		VWA9	MASP1
CRIPT		SEMA7A	C5orf27
C10orf95		NDST4	SUPT7L
SORBS3		HNRNPD	LIN54
TARDBP		KIAA1109	HDHD2
RDH10		NAAA	ADAMTS9
ZNF141		NUP54	LRRC49
TSHZ3		2021-09-11	HLF
PYROXD1		USO1	BBX
GHSR		FBN2	CYP4F11
FYTTD1		KIF21A	FNDC3A
SCRN1		AEBP2	DPCR1
BBS9		LLPH	YPEL5
INHBA		GIT2	FGF1
KIAA1045		C12orf10	RAD51AP1
DCAF10		TMBIM6	PTGFRN
FAM149B1		ANKRD52	SESTD1
SEC61A1		ESD	C9orf114
LTBP4		RB1	CTF1
ZNF350		SETD1B	FNTB
MOCS3		RBM26	MLL3
FBXO9		MBNL2	TBPL1
PACSIN1		ABHD13	ADCY4
BTN1A1		SYT16	ABTB2
BTN3A3		NIPA2	ZNF84
MEA1		MFAP1	GPR151
PIWIL1		SRP14	LL22NC03-63E9.3
PTGER2		GLYR1	PARD6B
SLC35F5		TGFB1I1	PRSS12
TNFSF14		ZCCHC14	SLC23A2
TMX4		PCTP	NEDD9
FNTB		CLTC	KLF6
PLAGL2		GALNT1	ZCCHC24
SLC35E2		FOXK2	INADL
RRAS		RNF157	ZNF709
CANX		IGFBP4	HDX
ZNF317		NFIC	TATDN1
PIN1		SAE1	ABHD13
CYP4F11		CARM1	MAPK4
KLF2		SERBP1	SIM2
SYNGR3		LMO4	BRWD1
ZNF10		CELSR2	CBX5
DGCR6L		POU2F1	TTPAL
GNAZ		LYPLAL1	SYNGR3
NAA38		MCL1	JMY
ALDH1A2		POGZ	MXRA7
USP6		RIT1	ZNF91
TXNDC17		MLK4	SORBS2
BCL2L2		FBXO28	SDF4
MAPK8IP3		PLEKHA6	ZFP30
DOCK7		CALM2	ARHGAP28
DHX40		SCRN3	ASXL2
DHRS11		VGLL4	NR1I2
SULT1C2		RAB5A	ZBTB47
KIAA1244		CTDSP1	C1orf173
GRHL2		RQCD1	MBOAT2
RHOBTB2		GOLGA4	RIMS2
ZNF764		OSBPL11	CAMK2N1
ZNF426		2021-03-06	MAP7D1
C12orf65		RNF145	ZNF142
SLC35D2		RPL7L1	FANCI
GSE1		CYP39A1	ORAI3
ABCB7		PNRC1	VPS54
MRPS25		TMEM181	MEIS1
TBC1D5		PURB	PNISR
ZFYVE20		C7orf43	KAAG1
G6PC		GIGYF1	ZW10
PCDHAC1		TMEM209	TMEM154
NDFIP1		C7orf55-LUC7L2	BAALC
ZNF132		ZNF182	NCOA1
RRP8		ZNF711	COG1
EFR3A		SLC25A37	LMO4
PER2		LACTB2	AJUBA
SCLY		SIGMAR1	SOBP
LANCL2		NR6A1	AL139147.1
GRSF1		SURF4	PRKACB
SNAP25		ADD3	CTGF
MTL5		EIF4EBP2	ERI1
BHMT2		TUT1	XYLT1
ZBED3		CELF1	HHIPL2
KRBA1		ZC3H12C	ZNF471
TMTC1		LAMTOR1	NCR3LG1
FABP4		HYOU1	FBP2
ADAMDEC1		LSM14B	TRAPPC8
CTIF		YTHDF1	ADPRH
MBD2		ALDOA	INO80D
IER3IP1		TAOK2	HMBOX1
KATNBL1		CWC15	KDM5B
SORT1		CRIM1	NDEL1
ANO3		TWF1	KCND3
NEDD4L		NEK7
RERG		FAM160B1
DSC1		C5orf28
GDF11		UHMK1
MIP		JMY
RAB11FIP5		MBNL1
KCNMB4		SMARCA5
NDRG4		TMEM87B
USP37		RMND5A
CAB39		TOMM70A
MFSD9		MIA3
DRAM1		FAM69A
SLC41A2		BTG3
IGF2BP3		ATP5J
TTC5		OXNAD1
IREB2		KLF10
2021-03-07		ATP6V1C1
CD302		OTUD6B
GALNT5		CDK19
CFC1		PI4K2A
HS6ST1		HSPA13
UGGT1		MOV10
TOR1B		SLC16A1
SLC31A2		LARP1
PSORS1C1		RASA2
RNF144B		KIF5A
FAM8A1		NAA11
FHDC1		BACH1
TGS1		RPL30
DCUN1D5		NPTN
FDXACB1		TATDN2
NUSAP1		CPT2
NOX5		KIT
BCL2L10		C2CD2
KHK		BRAF
TIMM23		AP3S2
SLFN12L		CNOT11
HECW2		ZC3H18
SLC40A1		PPP1R15B
TSPAN11		ELK4
SLC16A7		RAPGEF6
SLCO1B3		UBE2Z
TMCC3		RUNX1
FAM189A1		SIM2
LIPG		CYB5R1
NUAK1		BTG2
KLHL5		NAE1
TBC1D1		EFCAB14
TRAF5		TPPP3
DGKH		ZDHHC1
AP5M1		GNE
ZNF430		DFFA
RNF138		ZBTB8A
LPIN2		VMA21
UTP6		NDUFV3
ANKRD13A		U2AF1
CDH1		TRAPPC10
IL17B		ZNF714
PDGFRB		GPSM1
GNB5		TAOK1
MYO5C		LMNA
APH1B		ALKBH4
AAGAB		MGAT4B
TRIP4		PSMC2
FAF2		EMC10
RPS6KA5		SHANK2
PTGES3		NOL9
PIK3C3		ZSWIM5
CEP76		CAMK2N1
KMT2C		FUBP1
ANXA13		SLC30A7
TMED2		ZNF281
LMF1		DDR2
CRISPLD2		IER5
FOXF1		BROX
DNAH9		WDR26
ERP44		CFAP36
RABEP1		SMC6
ISM1		PDLIM5
COQ9		PTPN13
SRCAP		ATXN7
RAB2A		GMPS
CDKN2C		TIPARP
AJUBA		CCNL1
MAU2		MTHFD2L
PRKX		SNRK
C19orf10		ZNF148
TCF3		SNIP1
CSE1L		BAP1
GAB1		PRKCD
EEF2K		PBRM1
RAB36		UVSSA
PPM1F		FAM208A
ACTR3		SHISA5
DDX18		BSN
PACSIN2		PRSS12
OPA3		GUCY1A3
TCF25		CEP44
KCNK6		FAM160A1
DNAJC8		OTUD4
POLR1A		ITGA2
STRN		NIPBL
CHIC2		PRRC1
COQ10B		RICTOR
PIK3CA		PAPD4
DDX6		PDSS2
PVRL1		KIAA0895
SC5D		STK17A
CBL		C7orf60
DNAJC10		ZNF12
TUBB4A		ORC5
LCT		OXR1
GSK3B		UBAP1
TXK		ZNF367
GABRA4		VCP
ADD2		ARHGAP12
SEC22C		CFL2
ASB1		GTF2A1
CP		PCF11
CAD		ARF6
CLDN16		QSOX2
ITGA9		PRDX3
SIDT1		CASP7
PI4K2B		E2F7
FRAS1		ARL5B
ANXA3		GPR176
LMAN2L		HIF1AN
SLC10A7		BAG5
DGKG		NDEL1
RASGRF2		KIAA0430
LEF1		MESP1
EGF		DCTN5
RBM27		ZNF91
XPO5		CDK12
UGT2B10		ZNF180
NBN		SERTAD3
LAMP3		ZNF146
CDC14B		EEF2
SLC26A4		DDB1
SRI		CTNNB1
ANKIB1		SETD5
EIF4H		RNF187
WBSCR22		MAPK1IP1L
FSCN3		RBPJ
PIK3C2A		NT5DC2
HPX		IRF2
DIDO1		ATXN2L
SLC5A1		SLC20A2
ETNK1		STAT3
NDUFA9		ADAM9
LLPH		AXIN2
TMTC3		ZNF507
AMDHD1		CLIC4
ASCL1		BNC1
SLC15A4		ASPSCR1
SRRM4		TOR1AIP2
FANCM		MAP3K2
STON2		ALCAM
BNIP2		ZNF778
SRP14		SLC30A1
IGSF6		ARL6IP1
NKD1		SOCS6
TXNL4B		CDCA4
ZNF174		FOXN2
GAS8		PPM1D
MED9		RPS9
NCOR1		ZNF160
RASL10B		PYGO1
BZRAP1		KCNG3
EPN3		SOCS5
RHBDL3		LRRC8D
FN3KRP		ENC1
RNF157		ATF7IP
RNF165		TCEA2
NT5C3B		CAMTA1
FEM1A		RRM2
ZNF45		ZNF217
SIK1		GNG12
RNPEPL1		ZNF24
CACNG8		HCFC1
SLC47A1		ZMAT3
FCGR2A		FAM192A
KCNN3		DMXL1
ACP1		DCAKD
CNIH3		RXFP4
EXOC6B		LRRN3
POLR2D		SMARCC1
RAB5A		ZNF417
CTDSP1		MOB1B
LIMD1		EIF1
ATP6V1A		RNF213
TCTA		PHC3
SPATA5		KLHL15
2021-03-06		FAM174A
SRD5A1		RGMB
SKP2		PRPF8
PSD2		ZBTB4
LRRTM2		ZHX3
KAAG1		EXO1
RNF44		ATP2A2
MUT		C12orf76
ABT1		DENND4A
CYP39A1		NDUFA11
MMS22L		PDIK1L
VWDE		ZNF654
GNA12		CKAP5
FRMPD3		ARHGAP1
DOK2		ZNF519
DOCK5		TMEM9B
ST18		SMAD2
LACTB2		FOSL1
IFNA1		MLXIP
SLC1A2		ORAI3
RPS3		LMNB2
C11orf52		RMDN1
ZNF343		ANO6
MS4A2		ULK1
YBX3		CHD9
CTF1		SAMD12
UHRF1BP1L		JUN
HNMT		SOX12
PRSS23		C2orf69
CCT5		KCTD12
FREM2		ZBTB7A
PITPNM2		NSUN7
SLC7A11		PIPOX
TMEM18		MYADM
CEP128		TSHZ1
MLF1IP		PAK2
GUF1		FAM73A
MCHR2		YOD1
EPHA4		TMEM64
FARSB		ZDHHC20
ATP5A1		HOXC10
PDK1		ZFP82
ZNF551		FKRP
CAMK4		EHMT1
FLT1		ZNF678
YAP1		SGSH
GMCL1		PLAG1
SLC30A6		ZNF716
ITGA1		SYNM
TCTEX1D1		CLN8
ADAMTS18		CACNB4
ZNF117		SATB1
SRP19		SPATA13
SYCP2L		ZNF320
PLEKHG4B		DAZAP2
HGD		GRIN2A
HS3ST3A1		MEX3B
GDPD1		ALYREF
GRAP		ZNF703
ANKH		IQGAP3
UBASH3B		CDCA2
TOMM70A		TMEM121
FAM167A		DGAT1
SH3RF1		MANEAL
GPR26		DDX51
ADAMTS5		CCDC137
ACAA2		GPRIN3
ZNF286B		PARPBP
MARVELD1		ROR1
HSPA13		PCGF3
PDE11A		P4HB
CASP10		ZFP36L1
MED7		BRWD1
FAM161B		YTHDF3
MMP16		BICD2
KCNS2		ZNF566
KIF6		ZFP91
VPS8		ZDHHC17
NTAN1		ZFP69B
STEAP2		ZFP69
FZD1		ZNF626
HYDIN		DCUN1D3
ERC2		H2AFX
PREX2		RALGAPA2
PEX10		PTAR1
MRPL17		H1F0
FAM46B		ZNF33A
PCDHAC2		TSPYL1
PCDHA13		LIN54
PPP1R9A		ZNF724P
NPC1L1		ZNF681
ANK1		TUBB
CHRNB3		LCOR
PPP3CC		ZNF107
IL10RB		ZNF493
HOXB13		IARS
GOLGA6A		YRDC
BTG2		DAPK1
IRX6		HLA-DQA1
CELF3		SRGAP1
PGLYRP3		ZNF470
PKNOX1		ZNF100
AGPAT3		TBC1D9B
ZNF626		PELI1
CXCR5		ENPP1
RNF126		CDC42SE1
IER2		KLHL14
LRRC14		FAM114A1
PCYT1A		MCMBP
SOX8		OCLN
CLPB		ERO1L
NEU3		DNM3
MAP4K2		MRPL42
TPCN2		ENTPD7
FGF19		RPS6KL1
ZYG11B		TUBB3
PTCHD2		ZNF813
NMNAT2		GFPT1
C1orf115		MGEA5
REL		MAFK
NEUROD1		ZNF43
ZNF514		ARC
CCNT2		TLK1
IWS1		NCOA6
GABRB1		SLC5A3
FSTL1		OPA1
PRKCI		MFAP3L
SPICE1		CHML
KIAA1407		PCMTD2
ATXN7		C6orf48
PRICKLE2		GNL1
ADAMTS9		TRIM27
TIPARP		PCDHA9
PCNP		SLC35B4
CXCL5		TRIQK
SHROOM3		LGR4
RYK		TMEM170B
CDCP1		IPO7
SNIP1		TSN
SENP2		C17orf51
MASP1		KLHL23
RFT1		SUPT4H1
MFI2		ZBTB9
CLDN19		PPP1CB
WDR82		ZNF134
PRSS12		EMP2
MAD2L1		LTB4R2
ANXA5		CCNL2
GUCY1A3		EXOSC6
CEP44		PARG
NPY1R		TAPBP
IL15		C9orf69
HHIP		RNF103
ITGA2		RBM14
ANKRD33B		PEG10
TIGD6		PSG4
ENPP6		UPK3B
UTP15		ZNF585B
TERT		ZCCHC3
CCDC127		ZNF564
T		PRKDC
KIAA0895		UTP14C
GALNT10		PCDHGB2
SAP30L		LYN
SHH		RP11-712L6.5
SBSPON		ZNF253
KIAA1161		GAN
TMEM65		RPL17
CNTNAP3		TXNIP
COL14A1		AC024592.12
HDX		MTRNR2L12
C9orf3		ZNF728
AQP3		ZNF587B
WDFY2		ZNF280B
INPPL1
DNAAF2
ARF6
TMEM63C
TMEM52B
TSC1
TRUB1
SPRED1
GPR176
ADAMTS15
AVPR1A
HEATR3
TMEM132B
ANAPC16
TRIM44
MSS51
POTED
IDH3A
CLEC4E
CLEC4D
BEAN1
MMP3
COG1
ZNF592
C16orf45
FANCI
PEX11A
DCTN5
STAT6
PATL1
CCNDBP1
TCP10L
NUDT21
GOLGA6C
NOD2
HDHD2
ZNF91
MARK4
ERCC1
USP32
ZNF641
ZFP28
TSR1
NDUFA7
TK1
ZNF597
DDB1
SLC22A11
MSANTD4
PYGO1
TRIM8
ABR
RGPD8
ZNF25
LETM1
KCNK3
CSNK1G1
IL7R
EMB
MECP2
BTD
HAS2
ORMDL3
ZNF440
CPLX1
C15orf40
SUV420H1
TMEM154
SLC6A19
RNMTL1
KNDC1
CTNND2
FAM171B
VASN
SHE
LONRF3
TPST1
UQCRFS1
ADH1B
ESCO2
TRIM35
PRND
RNF187
KCNG3
CBR4
KRTAP1-1
CEP120
TMEM192
B4GALT6
CHRNA7
OTUD7A
SOSTDC1
AXIN2
KLF13
ABHD15
PDCD6IP
USH2A
PCDHA10
SLCO1A2
MAGI3
HOOK3
FAM195A
ZNF17
PPID
RP11-1055B8.7
ASCC2
ZWILCH
RGMB
FAM57A
LEMD3
PLA2G1B
RSF1
STOX2
ABCD2
PCMTD2
UBXN2A
LCLAT1
ZHX3
XCR1
ZMIZ2
KLRC4
MOB1B
SH3RF3
CGGBP1
HSPA6
GCC2
CARKD
KLK10
CLOCK
MSL2
AGFG1
CYP7B1
CTSF
VCPIP1
TNKS
CASP2
PPP1R3B
SUGT1
SPSB4
SULT1B1
C11orf45
DCAF7
MYO1H
CCPG1
SLC22A9
ZNF738
ZNF431
GPR151
PCSK1
HEG1
P2RY2
LRCH1
HPSE
ZMAT3
RAB1B
PLAC8
OR9Q2
SH3PXD2B
FBXO31
AQP1
ZNF507
GAL3ST3
ZNF417
LAS1L
DST
MRPL46
PEAK1
MRPL45
KIAA1551
TNFRSF10D
LSMEM1
SEC16A
DVL3
PFN4
SERTAD2
OSBPL3
CDK5R1
FBXO34
UCP3
STAT2
ZHX2
NHP2
C3orf17
BVES
SKA3
HNRNPA0
GPR88
ZNF354C
USP20
EMR2
CHFR
MDH2
HEPHL1
TFE3
MAP7D3
HNF4A
GCNT2
KIAA2018
AHRR
ZNF540
CALR
ZBTB8A
AP3S1
OXTR
PLAG1
TIGD2
PER1
CD300LG
MTG1
ZMYM6
CERS5
RP11-429E11.3
NOS1
AMOTL1
CA8
GRHPR
NBPF3
TSTD1
ZNF366
ABL1
FIBIN
ZFP3
SWAP70
MLXIP
PSAPL1
KLHL11
RAPH1
SHISA3
STK17A
IL17RA
ZDHHC22
WDTC1
SHISA2
SCD5
USH1G
ZDHHC20
KIF1A
MBOAT4
SSBP2
C9orf62
KIF1C
RNF144A
CRTAP
IGSF9B
YBX1
GCC1
PPIP5K2
CASKIN2
TMEM132E
CA13
EHD3
TRIM72
PANK1
SMC1A
WDR33
GIPC3
KCTD2
FAM124A
EPM2AIP1
MINOS1
KCNH5
RRP7A
ZNRF2
ZNF491
SENP5
ST8SIA3
CYP2B6
TDRP
CD28
CIITA
PSEN1
SCN4B
CREG2
MED14
ARID1A
ANGPT2
WDFY4
FBXW5
CEP57
P2RY13
RNF185
ABCF1
ZNF639
ITM2C
CRELD1
C3orf80
SPAG11A
ZNF609
C1orf173
ABLIM3
ACAP2
ZNF274
LCORL
TIMM22
ATP10B
KHDRBS1
SMAD3
XKR4
C11orf87
IFNLR1
MC2R
FAM110C
TRIM52
C16orf72
PHF7
RAB11B
SPSB1
FAM208B
ZNF85
KCNH8
MITF
ZNF26
KCNJ15
SIRT7
NXPH3
ZNF92
KCNIP1
P2RX7
PLB1
NFAM1
OGFOD3
NOP56
MAGEA6
NPAP1
RGPD6
PEX26
CALHM1
ZDHHC23
MRTO4
TGIF1
CDCA2
ZNF470
CD300C
ADAP2
SOX1
ZNF285
CLN8
FBXW4
ZNF703
PSMG1
TMEM106A
RNLS
ACTB
CNTN2
GLUL
HEXIM1
GPR173
TRAK2
MXI1
RLIM
DBX2
TMEM105
MTMR3
MGAT1
C11orf72
ZSCAN30
ANKRD45
TMED7-TICAM2
FAM83F
PGP
CISD1
RGS7BP
ZNF749
ZNF347
DLST
ZNF555
TMLHE
FMN1
SLX4IP
TMEM212
FSD2
ZACN
DCUN1D4
ENTPD5
C3orf70
ZNF486
DHRS4L2
TESC
FOXK2
PIP5K1C
WASF3
GLDN
SF3B1
HM13
PPP2R2C
TDP1
SLK
ZNF212
PSMF1
PNRC1
RNF24
THEM6
SLC22A8
SNTB2
LARP1
ZXDC
AP3S2
GNL3L
HORMAD2
SEL1L
CSH2
OPRL1
LCK
MID1IP1
SEC62
MRPL35
EZR
NUDT4
MXD4
CTBP2
STARD7
PCID2
LUC7L
NIPA1
KIAA1958
AP1S1
SUPT7L
C6
ELAC2
RUNDC3B
SNURF
MRPL30
ZNF600
SLC23A2
ISCU
ADCY2
NBPF9
GJB5
SLC28A1
VWA1
MTSS1L
EIF4EBP1
SMTNL2
METTL24
RNASE9
PSPC1
PHF8
ZC3H12B
NCR3LG1
ABHD12
SYNRG
ZNF621
ZNF788
PRMT7
CLIC5
DMP1
GALNT15
DAB2
FGFR3
MEF2C
LGALS12
KRTAP24-1
C2orf88
KCNK10
SLC2A14
CCNG1
PPIL4
MCCC2
ANAPC1
BSDC1
NIPAL2
MKNK1
MGAT3
CFL2
LDOC1L
NRG1
TRIM14
INSR
ANKFY1
MPRIP
NCOA3
ASTN2
FAM163A
TMEM220
NRXN1
SSX2IP
RBPJ
PRLR
MASTL
INSIG1
ZNF341
PLSCR1
SOX12
KIAA0247
TM7SF3
SRSF10
ARHGEF39
CDHR3
HHIPL2
ATP7A
THNSL2
UBTF
ZNF678
UBAP2L
CORO2A
ZC3H6
FGD6
ZNF136
SPINT1
IYD
MED22
MUM1
GLYAT
TRADD
LIN28B
DPPA3
RNF41
FOXN3
ARHGAP5
TTC8
MBNL2
TUBD1
CHST15
LRRC15
RBM5
GPAM
SEC31A
AP5Z1
ARID4B
UQCC1
COG3
THBS4
PDE1A
TOR1A
FAM114A2
APOL4
RAD51AP1
ACACA
GDE1
SLC6A20
SKP1
PPTC7
COPS8
C11orf48
ELOVL2
ACAP3
HEY1
SND1
GABPA
FMOD
PDE5A
TMEM110
SRGAP1
OCLN
GIT2
THSD4
CCDC69
ACAD11
ZNF536
TLR4
MLH3
MXRA7
ERCC6
GPR160
ATP5G1
SLC25A46
SEMA6D
STK39
RBM38
SH3BP2
ACOX3
EML6
MAN1A2
APOLD1
GABRG2
ARC
PDLIM7
MAGEA1
RSPO3
POTEE
ZNF708
PRDX3
IGF2R
MED27
TRIM38
XPNPEP3
GM2A
ZDHHC9
SFPQ
FAM212B
REPS2
SYNJ1
C7orf50
ACSL3
C15orf38
RIMKLB
FXR1
ALDH5A1
POT1
ZNF816
MAFG
C17orf102
HHLA2
AMER2
HMX3
MAGEA12
ELK4
TMCC2
PAX5
VPS13D
WDR37
TMEM261
ELP2
FAM217B
ZNF100
WDR55
FAM73B
ESRP1
ARNT
ANKRD17
FRMD4A
FCGR2B
HELZ
ZXDA
QSOX2
AC079612.1
ZNF669
CAMSAP2
TMC2
VCP
MYPN
VTCN1
VSIG10
ADAM29
ODF2L
FAM86C1
TPGS1
XRCC2
ARAP1
PLCG2
C1orf116
KCNK5
EMP2
LRP10
LRRC61
ZRANB1
DSG4
ATG2B
ZNF517
DMBX1
SPN
ERGIC2
AFAP1
VPS13A
GATAD2A
ZNF460
ZNF280B
CDH4
CNPPD1
CDC42SE2
TPPP
PCED1A
FLJ27365
PCGF2
SCYL2
SIGLEC14
NAA60
DNAJC5
ENPP1
GRAMD4
ZNF627
CCL28
IQGAP3
PAPSS2
SLC26A11
RNF34
C8A
CD47
IFT140
TNNI1
CTNNBL1
HMGN2
RPL12
LRRC10
BRINP2
SEPN1
DZIP3
ABLIM2
HHLA3
ZNF277
ASTN1
SPRYD7
TSC22D2
TMEM184B
INO80
SFMBT2
PCGF3
FAM9B
GCSAML
ZNF670
AKT3
WDR64
MTR
TOMM20
MLK4
NTPCR
EGLN1
CCSAP
RAB4A
THBS2
C1orf95
DACT2
PDE10A
AGPAT4
PTPN14
VASH2
NENF
SLC30A1
RD3
SERTAD4
PFKFB2
DYRK3
IKBKE
SLC41A1
NUCKS1
MFSD4
TMEM81
MTRF1L
UBE2T
GPR37L1
ELF3
C6orf211
MTHFD1L
PLEKHG1
LHX9
CRB1
CFHR2
CDC73
UCHL5
UST
RAB32
TRMT1L
EPM2A
NPL
RNASEL
MR1
KIAA1614
XPR1
HIVEP2
TOR1AIP2
ABRACL
CACYBP
RC3H1
TNFSF4
C1orf105
MROH9
HBS1L
POGK
EYA4
SH2D1B
STX7
MED23
COPA
DCAF8
C1orf204
ETV3
RIT1
ASH1L
EFNA4
NKAIN2
SHC1
ECHS1
FAM162B
TSPYL1
BNIP3
MKI67
GATAD2B
ADAM12
S100A16
TDRKH
LHPP
KIAA1919
SLC16A10
AMD1
SCNM1
GABPB2
CEP57L1
HTRA1
SEC63
AIM1
SEC23IP
TIAL1
OTUD7B
EIF3A
NBPF20
NBPF14
NBPF24
PNLIPRP3
FAM160B1
TXNIP
CASP7
NBPF10
PDE4DIP
RRAGD
TTF2
MTCP1
IGSF3
ZNF292
DUSP5
NT5E
TBX18
CYB5R4
XPNPEP1
WNT2B
SORCS1
CCDC147
ME1
RAP1A
ATP5F1
TPBG
FAM46A
NEURL
NEURL1B
ELOVL4
GSTM2
SH3BGRL2
AS3MT
KIAA1324
MYO6
C10orf76
L1CAM
PRMT6
IDH3G
SLC30A7
DBT
POLL
LPPR5
ALG14
ZNF275
DR1
ARFGAP1
MAGEA3
MAGEA2
MAGEA2B
EVI5
SLC17A9
ZNF326
LRRC8C
GBP2
GBP1
SLC25A28
PI4K2A
ZNF451
ABCA9
BEND6
HS6ST2
ELOVL5
ARHGAP36
RRP12
ZNF831
LEPROT
EFHC1
ROR1
ITGB3BP
XPNPEP2
OCRL
TM9SF3
ENTPD1
TTC4
SLC25A27
TMEM59
NKAP
ZNF217
TSHZ2
ECHDC2
ZYG11A
GRIN1
MAN1B1
ADNP
TXNDC12
RAB3B
DNLZ
CMPK1
CYP4X1
ADAMTS13
ARFGEF2
STAMBPL1
EFCAB14
REXO4
LHFPL1
MINPP1
TMEM164
KCNE1L
HECTD3
MAT1A
TMEM254
AIF1L
EXOSC2
TSC22D3
LRRC73
C9orf78
MED8
ELOVL1
NUP62CL
RBM41
ZNF691
ERMAP
COMTD1
LRRC8A
RAB40A
BEX1
SDC4
COL9A2
CAP1
BMP8B
HEYL
TRUB2
TIMM8A
ANXA7
SRPX2
MEAF6
KLHL4
APOOL
PTPRT
SLC29A3
AGO1
ANKMY1
ZMYM1
ZDHHC15
YARS
RNF8
GOLGA1
GIGYF2
TXLNA
PPIL1
FABP3
SRSF3
RTKN2
TAF1
GMEB1
IPMK
PRKG1
A1CF
C6orf106
POLE3
MAPK8
PRPF4
ZFP37
SNX30
PTBP3
SLC30A2
NPY4R
GPRIN2
SYT15
LDLRAP1
CNR2
BMPR2
TMEM245
HTR1D
C1QC
IKBKAP
HSD17B8
AR
FZD8
FSD1L
EDA2R
SLC44A1
NIPSNAP3B
TP53INP2
PLA2G2F
C9orf156
PQLC2
TBXA2R
AAED1
METTL8
CBFA2T2
FBP1
FBP2
ALDH4A1
TMEM255B
KIAA1462
C9orf89
ECM2
HSPA1B
FAM131C
WAC
POFUT1
SPEN
SHC3
DNAJC16
ABHD13
EFHD2
SHROOM4
TEX30
AGTPBP1
CLCN5
ATP6V1G2
TCF19
SHISA7
ZIC2
C9orf64
GPR158
MSRB2
PSAT1
MTHFR
GNL1
GCNT1
PPP1R11
KLK9
EMC10
SOX21
SRM
DFFA
CNNM3
KIF1B
NEBL
MPP2
PTAR1
ZKSCAN3
C1orf200
H6PD
CLN5
KCTD12
TNFRSF9
CNTNAP3B
SLC22A12
POLR3F
PHF13
KLHL21
NOL9
MGME1
DIS3
POLR1E
PLCXD3
PCDH9
GPR153
PCSK2
PCDH17
RSU1
CEP68
FLRT3
ITGA8
RGP1
NDUFAF5
AC006486.1
C6orf62
GPR34
NMT2
TRIM13
AJAP1
CEP104
MRS2
FAM213B
CDNF
DCDC2
NRSN1
UNC13B
SLC35B4
LIG3
ITM2B
XK
FANCG
OXER1
SLC35E2B
COX7A2L
UQCRQ
DMD
SOWAHA
ID4
C2orf91
KIF3A
PEX16
SDHAF1
DVL1
ATL2
TPD52
DNAJC15
TMEM230
RGCC
PTCHD1
WBP4
GCM2
RPS6KA3
MAP7D2
NDNF
DCLK1
ITPA
TXLNG
CDKN2B
ALOXE3
MTAP
UBQLNL
IFNA2
CCDC85C
MLLT3
MOSPD2
SLC25A51
CPXM1
[truncated: 885 more rows]
